# Supplementary figures and images for: Continuous synthesis of a co-doped TiO2 photocatalyst and its enhanced visible light catalytic activity using a photocatalysis microreactor
Source: Royal Society of Chemistry journal article supplement (doi:10.1039/c5ra05956a), 2015-01-01

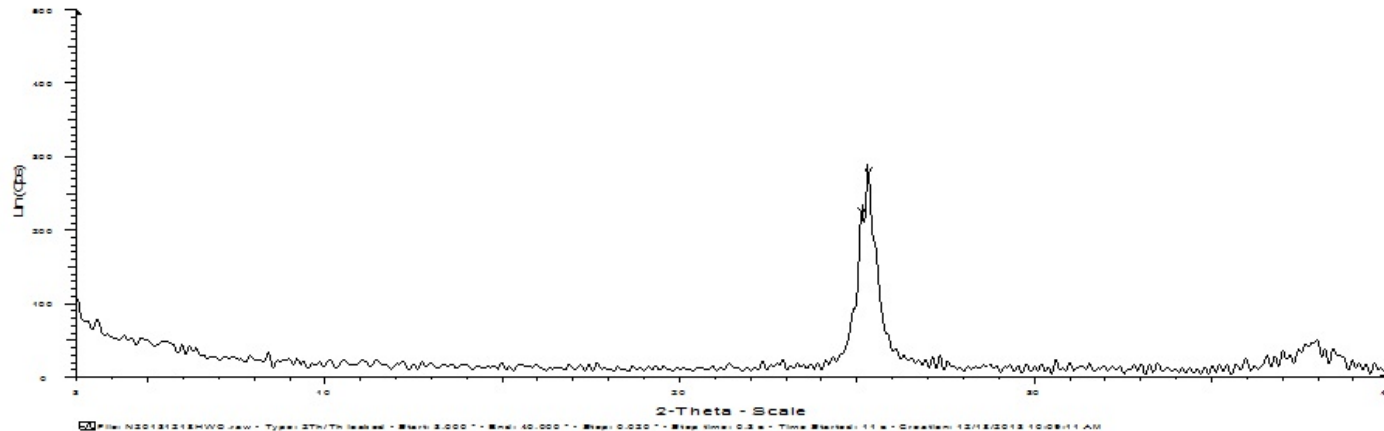

Supplement: c5ra05956a1.pdf [file c5ra05956a1.pdf]

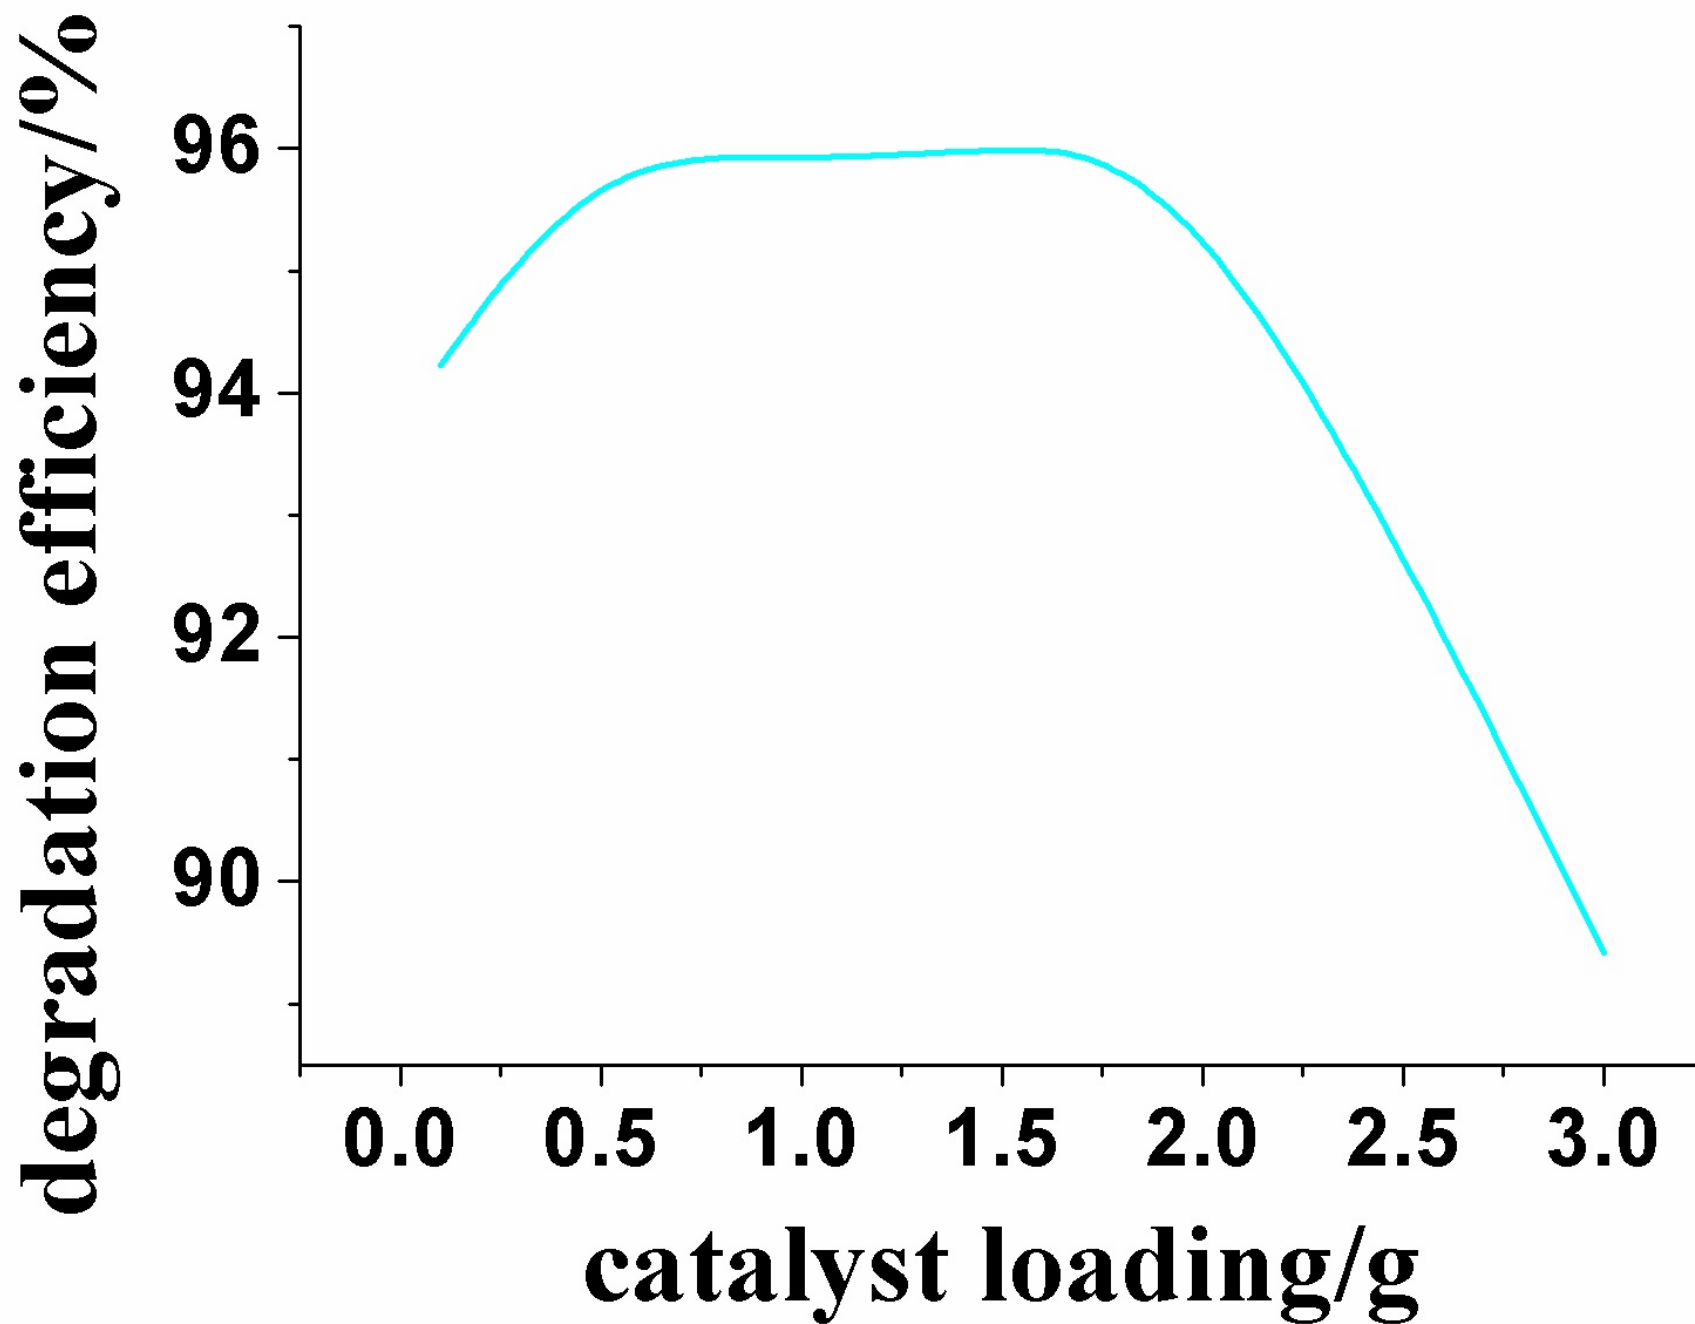

Supplement: c5ra05956a2.pdf [file c5ra05956a2.pdf]

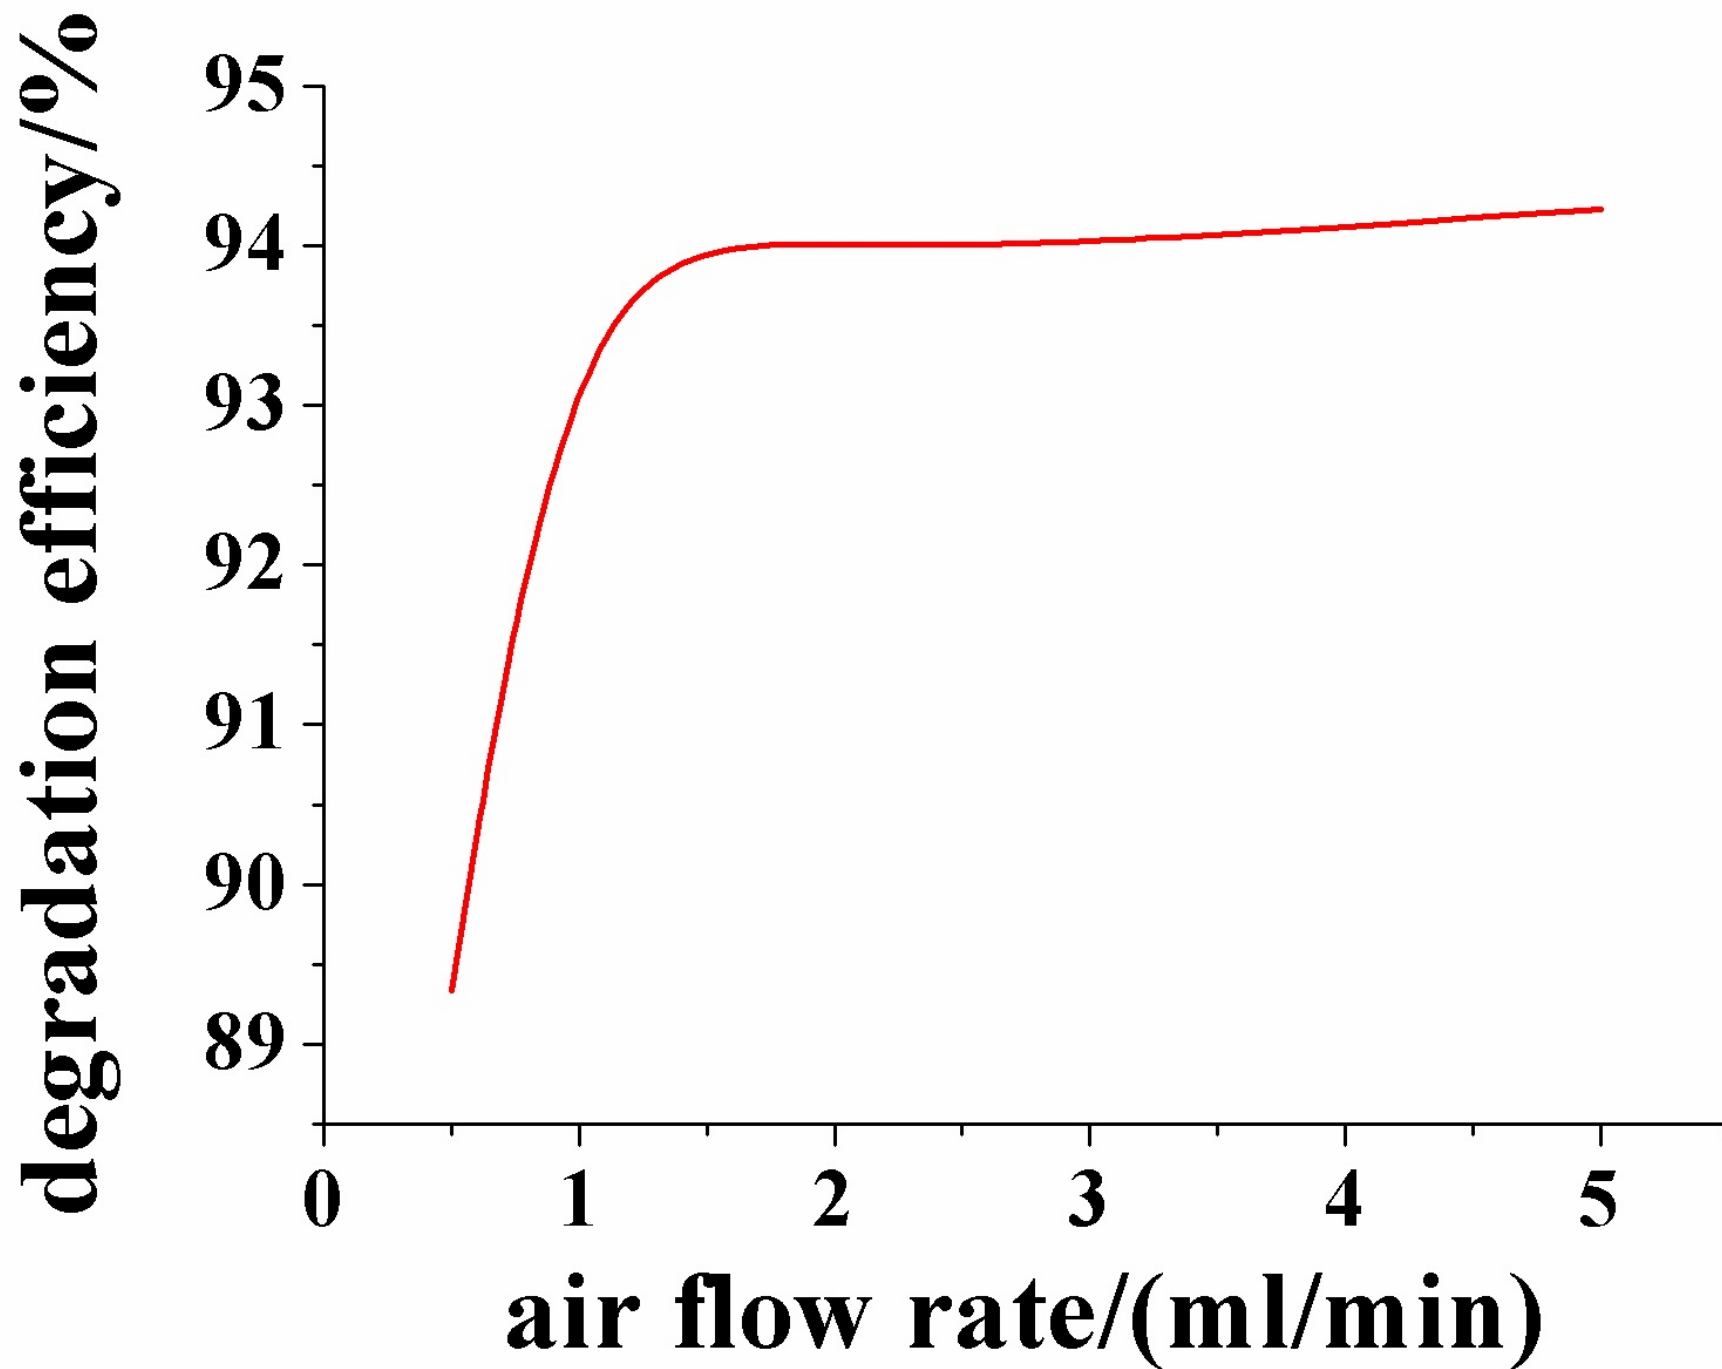

Supplement: c5ra05956a9.pdf [file c5ra05956a9.pdf]
